# Supplementary material for: Motor protein KIFC5A interacts with Nubp1 and Nubp2, and is implicated in the regulation of centrosome duplication
Source: Oxford University Press journal article supplement (doi:10.1242/jcs.02922), 2006-04-26
Supplement: jcs02922table1.pdf [file jcs02922table1.pdf]

**Table S1. Effect of KIFC5A silencing on the number of centrosomes in interphase cells**

| siRNA                                   |                 | Control     | KIFC5A      |
|-----------------------------------------|-----------------|-------------|-------------|
| Number of interphase cells counted      |                 | 483         | 471         |
| Cells with                              | 2 centrosomes   | 436 (90.3%) | 353 (74.9%) |
| Cells with                              | 3 centrosomes   | 21 (4.3%)   | 33 (7%)     |
|                                         | 4 centrosomes   | 20 (4.1%)   | 40 (8.5%)   |
|                                         | 5 centrosomes   | 1 (0.2%)    | 17 (3.6%)   |
|                                         | 6 centrosomes   | 4 (0.8%)    | 14 (3%)     |
|                                         | 7 centrosomes   | –           | 6 (1.3%)    |
|                                         | 8 centrosomes   | –           | 4 (0.8%)    |
|                                         | 9 centrosomes   | –           | 1 (0.2%)    |
|                                         | ≥10 centrosomes | 1 (0.2%)    | 3 (0.6%)    |
| Cells with multiple centrosomes (total) |                 | 47 (9.7%)   | 118 (25.1%) |
| Average number of centrosomes per cell  |                 | 2.19        | 2.68        |
| (% of total cells)                      |                 |             |             |

The average number of centrosomes is significantly higher in KIFC5A- than control-silenced cells (single-factor ANOVA,  $P= 0.0196$ ).
