# Supplementary material for: Motor protein KIFC5A interacts with Nubp1 and Nubp2, and is implicated in the regulation of centrosome duplication
Source: Oxford University Press journal article supplement (doi:10.1242/jcs.02922), 2006-04-26
Supplement: jcs02922table2.pdf [file jcs02922table2.pdf]

**Table S2. KIFC5A silencing increases the mitotic index in the cell population (single-factor ANOVA,  $P=0.0148$ )**

| siRNA                         | Control           | KIFC5A            |
|-------------------------------|-------------------|-------------------|
| Total number of cells counted | 11377             | 10347             |
| Interphase cells              | 11311 (99.4%)     | 10230 (98.9%)     |
| Mitotic cells in              |                   |                   |
| prophase                      | 7 (<0.1%) [10.6%] | 17 (0.1%) [14.5%] |
| stalled prometaphase          | 1 (<0.1%) [1.5%]  | 1 (<0.1%) [0.9%]  |
| prometaphase                  | 28 (0.2%) [42.4%] | 36 (0.3%) [30.8%] |
| metaphase                     | 13 (0.1%) [19.7%] | 26 (0.3%) [22.2%] |
| anaphase                      | 4 (<0.1%) [6.06%] | 7 (<0.1%) [6%]    |
| telophase                     | 13 (0.1%) [19.7%] | 30 (0.3%) [25.6%] |
| Mitotic cells (total)         | 66 (0.6%)         | 117 (1.1%)        |
| (% of all cells)              |                   |                   |
| [% of mitotic cells]          |                   |                   |
