# Supplementary material for: Motor protein KIFC5A interacts with Nubp1 and Nubp2, and is implicated in the regulation of centrosome duplication
Source: Oxford University Press journal article supplement (doi:10.1242/jcs.02922), 2006-04-26
Supplement: jcs02922table3.pdf [file jcs02922table3.pdf]

**Table S3. KIFC5A silencing results in the increase of multi-nucleated cells (single-factor ANOVA,  $P=0.0018$ )**

| siRNA                              |           | Control      | KIFC5A      |
|------------------------------------|-----------|--------------|-------------|
| Number of interphase cells counted |           | 1139         | 536         |
| Interphase cells with              | 1 nucleus | 1126 (98.9%) | 436 (81.3%) |
| Interphase cells with              | 2 nuclei  | 11 (1%)      | 73 (13.6%)  |
|                                    | 3 nuclei  | 2 (0.2%)     | 19 (3.5%)   |
|                                    | 4 nuclei  | –            | 4 (0.7%)    |
| Apoptotic cells                    |           | –            | 4 (0.7%)    |
| Cells with multiple nuclei (total) |           | 13 (1.14%)   | 96 (17.91%) |
| (% of interphase cells)            |           |              |             |
