# Supplementary material for: Motor protein KIFC5A interacts with Nubp1 and Nubp2, and is implicated in the regulation of centrosome duplication
Source: Oxford University Press journal article supplement (doi:10.1242/jcs.02922), 2006-04-26
Supplement: jcs02922table4.pdf [file jcs02922table4.pdf]

**Table S4. KIFC5A silencing partly rescues the effect of Eg5 inhibition on the mitotic spindle**

| siRNA                                      |                     | Monastrol        | KIFC5A + Monastrol |
|--------------------------------------------|---------------------|------------------|--------------------|
| Total number of cells counted              |                     | 10972            | 10631              |
| Interphase cells                           |                     | 10498 (95.7%)    | 10338 (97.2%)      |
| Mitotic cells with                         | ‘monastral’ spindle | 443 (4%) [93.5%] | 201 (1.9%) [68.6%] |
| Mitotic cells in                           | prophase            | 17 (0.1%) [3.5%] | 42 (0.4%) [14.34%] |
|                                            | prometaphase        | 14 (0.1%) [3%]   | 38 (0.4%) [12.97%] |
|                                            | metaphase           | -                | 4 (0%) [1.37%]     |
|                                            | anaphase            | -                | 2 (0%) [0.68%]     |
|                                            | telophase           | -                | 6 (0.1%) [2.05%]   |
| Mitotic cells<br>(non-monastrol phenotype) |                     | 31 (0.2%) [6.5%] | 92 (0.9%) [31.4%]  |
| (% of all cells)                           |                     |                  |                    |
| [% of all mitotic cells]                   |                     |                  |                    |
