# Supplementary material for: Motor protein KIFC5A interacts with Nubp1 and Nubp2, and is implicated in the regulation of centrosome duplication
Source: Oxford University Press journal article supplement (doi:10.1242/jcs.02922), 2006-04-26
Supplement: jcs02922table5.pdf [file jcs02922table5.pdf]

**Table S5. Effect of Nubp1 silencing on number of centrosomes in interphase cells**

| siRNA                                   |                 | Control     | Nubp1       |
|-----------------------------------------|-----------------|-------------|-------------|
| Number of interphase cells counted      |                 | 301         | 301         |
| Cells with                              | 2 centrosomes   | 263 (87.4%) | 188 (62.5%) |
| Cells with                              | 3 centrosomes   | 16 (5.3%)   | 36 (12%)    |
|                                         | 4 centrosomes   | 14 (4.7%)   | 23 (7.6%)   |
|                                         | 5 centrosomes   | 2 (0.7%)    | 17 (5.6%)   |
|                                         | 6 centrosomes   | 3 (1%)      | 13 (4.3%)   |
|                                         | 7 centrosomes   | -           | 7 (2.3%)    |
|                                         | 8 centrosomes   | 1 (0.3%)    | 3 (1%)      |
|                                         | 9 centrosomes   | 1 (0.3%)    | 5 (1.7%)    |
|                                         | ≥10 centrosomes | 1 (0.3%)    | 9 (2.9%)    |
| Cells with multiple centrosomes (total) |                 | 38 (12.6%)  | 113 (37.5%) |
| Average number of centrosomes per cell  |                 | 2.29        | 3.22        |
| (% of total cells)                      |                 |             |             |

The average number of centrosomes is significantly higher in Nubp1- than control-silenced cells (single-factor ANOVA,  $P= 0.0048$ ).
