# Supplementary material for: Motor protein KIFC5A interacts with Nubp1 and Nubp2, and is implicated in the regulation of centrosome duplication
Source: Oxford University Press journal article supplement (doi:10.1242/jcs.02922), 2006-04-26
Supplement: jcs02922table6.pdf [file jcs02922table6.pdf]

**Table S6. Nubp1 silencing increases the proportion of multi-nucleated cells in the population (single-factor ANOVA,  $P=6.15 \times 10^{-6}$ )**

| siRNA                              |           | Control      | Nubp1        |
|------------------------------------|-----------|--------------|--------------|
| Total number of cells counted      |           | 4139         | 4077         |
| Interphase cells with              | 1 nucleus | 4053 (97.9%) | 3854 (94.5%) |
| Interphase cells with              | 2 nuclei  | 79 (1.9%)    | 213 (5.2%)   |
|                                    | 3 nuclei  | 7 (0.17%)    | 8 (0.2%)     |
| Apoptotic cells                    |           | –            | 2 (0.05%)    |
| Cells with multiple nuclei (total) |           | 86 (2.08%)   | 221 (5.42%)  |
| (% of interphase cells)            |           |              |              |
