# Supplementary material for: Motor protein KIFC5A interacts with Nubp1 and Nubp2, and is implicated in the regulation of centrosome duplication
Source: Oxford University Press journal article supplement (doi:10.1242/jcs.02922), 2006-04-26
Supplement: jcs02922table7.pdf [file jcs02922table7.pdf]

**Table S7. Comparative analysis of the effect of silencing treatments carried out in parallel on the number of centrosomes in interphase cells**

| siRNA |                                         | Control    | Nubp1      | Nubp2     | Nubp1&2     |
|-------|-----------------------------------------|------------|------------|-----------|-------------|
|       | Number of interphase cells counted      | 200        | 200        | 200       | 200         |
|       | Cells with 1 centrosome                 | 11 (5.5%)  | 23 (11.5%) | 32 (16%)  | 16 (8%)     |
|       | Cells with 2 centrosomes                | 164 (82%)  | 94 (47%)   | 120 (60%) | 111 (55.5%) |
|       | Cells with 3 centrosomes                | 10 (5%)    | 26 (13%)   | 14 (7%)   | 32 (16%)    |
|       | 4 centrosomes                           | 11 (5.5%)  | 17 (8.5%)  | 19 (9.5%) | 14 (7%)     |
|       | 5 centrosomes                           | 1 (0.5%)   | 13 (6.5%)  | 5 (2.5%)  | 7 (3.5%)    |
|       | 6 centrosomes                           | 1 (0.5%)   | 11 (5.5%)  | 2 (1%)    | 6 (3%)      |
|       | 7 centrosomes                           | –          | 3 (1.5%)   | 2 (1%)    | 3 (1.5%)    |
|       | 8 centrosomes                           | 1 (0.5%)   | 2 (1%)     | 3 (1.5%)  | 4 (2%)      |
|       | 9 centrosomes                           | 1 (0.5%)   | 5 (2.5%)   | 1 (0.5%)  | 1 (0.5%)    |
| ≥     | ≥10 centrosomes                         | –          | 6 (3%)     | 2 (1%)    | 6 (3%)      |
|       | Cells with multiple centrosomes (total) | 25 (12.5%) | 83 (41.5%) | 48 (24%)  | 73 (36.5%)  |
|       | Average number of centrosomes per cell  | 2.20       | 3.23       | 2.48      | 3.01        |

(% of interphase cells)

- Nubp1 silencing increases the average number of centrosomes per interphase cell in a statistically significant manner, compared with control silencing treatment (single-factor ANOVA,  $P=0.025$ ).
- Nubp2 silencing effect is not statistically different from the control ( $P=0.240$ ).
- Simultaneous silencing of Nubp1&2 maintains the increased average number compared with the control ( $P=0.009$ ) but Nubp1&2 silencing effect is not statistically different from Nubp1-only silencing ( $P=0.328$ ).
