# Supplementary material for: Motor protein KIFC5A interacts with Nubp1 and Nubp2, and is implicated in the regulation of centrosome duplication
Source: Oxford University Press journal article supplement (doi:10.1242/jcs.02922), 2006-04-26
Supplement: jcs02922table8.pdf [file jcs02922table8.pdf]

**Table S8. Comparative analysis, from the same sets of experiments as in Table S7, of the effect of silencing treatments carried out in parallel on the number of centrosomes in mitotic cells**

| siRNA                                   |                 | Control     | Nubp1       | Nubp2       | Nubp1&2    |
|-----------------------------------------|-----------------|-------------|-------------|-------------|------------|
| Number of mitotic cells counted         |                 | 173         | 161         | 185         | 135        |
| Cells with                              | 2 centrosomes   | 149 (86.1%) | 119 (73.9%) | 159 (85.9%) | 99 (73.3%) |
| Cells with                              | 3 centrosomes   | 9 (5.2%)    | 15 (9.3%)   | 11 (5.9%)   | 5 (3.7%)   |
|                                         | 4 centrosomes   | 7 (4%)      | 11 (6.8%)   | 8 (4.3%)    | 15 (11.1%) |
|                                         | 5 centrosomes   | 3 (1.7%)    | 2 (1.2%)    | 2 (1.1%)    | 3 (2.2%)   |
|                                         | 6 centrosomes   | –           | 7 (4.3%)    | 3 (1.6%)    | 3 (2.2%)   |
|                                         | 7 centrosomes   | 3 (1.7%)    | –           | –           | 3 (2.2%)   |
|                                         | 8 centrosomes   | 2 (1.2%)    | 6 (3.7%)    | –           | 4 (3%)     |
|                                         | 9 centrosomes   | –           | –           | –           | 1 (0.7%)   |
| ≥                                       | ≥10 centrosomes | –           | 1 (0.6%)    | 2 (1.1%)    | 2 (1.5%)   |
| Cells with multiple centrosomes (total) |                 | 24 (13.9%)  | 42 (26.1%)  | 26 (14.1%)  | 36 (26.7%) |
| Average number of centrosomes per cell  |                 | 2.34        | 2.71        | 2.36        | 2.89       |

(% of mitotic cells)

- Nubp1 silencing increases the average number of centrosomes per mitotic cell in a statistically significant manner, compared with control silencing treatment (single-factor ANOVA,  $P=0.025$ ).
- Nubp2 silencing effect is not statistically different from the control ( $P=0.937$ ).
- Simultaneous silencing of Nubp1&2 maintains the increased average number compared with the control ( $P=0.0015$ ) but Nubp1&2 silencing effect is not statistically different from Nubp1-only silencing ( $P=0.112$ ).
