# Supplementary material for: Motor protein KIFC5A interacts with Nubp1 and Nubp2, and is implicated in the regulation of centrosome duplication
Source: Oxford University Press journal article supplement (doi:10.1242/jcs.02922), 2006-04-26
Supplement: jcs02922table9.pdf [file jcs02922table9.pdf]

**Table S9. Comparative analysis, from the same sets of experiments as in Table S7, of the effect of silencing treatments carried out in parallel on the number of nuclei per cell**

| siRNA                              |           | Control      | Nubp1        | Nubp2        | Nubp1&<br>Nubp2 |
|------------------------------------|-----------|--------------|--------------|--------------|-----------------|
| Total number of cells counted      |           | 3000         | 3000         | 3000         | 3000            |
| Interphase cells with              | 1 nucleus | 2927 (97.6%) | 2833 (94.4%) | 2944 (98.1%) | 2873 (95.8%)    |
| Interphase cells with              | 2 nuclei  | 68 (2.3%)    | 160 (5.2%)   | 52 (1.7%)    | 118 (3.9%)      |
|                                    | 3 nuclei  | 5 (0.2%)     | 7 (0.2%)     | 3 (0.1%)     | 7 (0.2%)        |
|                                    | 4 nuclei  | –            | –            | 1 (0%)       | 2 (0.1%)        |
| Apoptotic cells                    |           | –            | –            | –            | –               |
| Cells with multiple nuclei (total) |           | 73 (2.4%)    | 167 (5.6%)   | 56 (1.9%)    | 127 (4.2%)      |

(% of interphase cells)

- Nubp1 silencing increases the percentage of multinucleated cells in a statistically significant manner, compared with control silencing treatment (single-factor ANOVA,  $P=3\times 10^{-5}$ ).
- Nubp2 silencing effect is not different from the control ( $P=0.222$ ).
- Simultaneous silencing of Nubp1&2 maintains the increased proportion of multi-nucleated cells compared with the control ( $P=0.0016$ ) and the Nubp1&2 silencing effect is borderline statistically different from Nubp1-only silencing ( $P=0.046$ ).
