# Supplementary material for: Motor protein KIFC5A interacts with Nubp1 and Nubp2, and is implicated in the regulation of centrosome duplication
Source: Oxford University Press journal article supplement (doi:10.1242/jcs.02922), 2006-04-26
Supplement: jcs02922table10.pdf [file jcs02922table10.pdf]

**Table S10. List of oligonucleotides used**

| Name   | Forward primer                | Reverse primer                     |
|--------|-------------------------------|------------------------------------|
| Set 1  | ggatccatggaggatgccttggag      | ttgcaagggaatcaggctctg              |
| Set 2  | ggatccagtgcccggtgtcttggga     | ggatccgacttcacttcttattagc          |
| Set 3  | gaggccacctttgttgaagt          | cctccagctccaagacacgg               |
| Set 4  | cttcattgacctcaactacatggt      | tcattgatgaccttggccaggg             |
| Set 5  | catccgcaagcctgtgacgg          | ggcgcttgcgtgcttccttg               |
| Set 6  | gaagtggacctggtgttactcc        | gcctcctccaggtgcctcag               |
| Set 7  | ccagtgtaaatctgacctgc          | cggacacatttctggaataga              |
| Set 8  | actgactcgagatggaggaggcgccccac | tgtgtctcgagtcagggactgatgagggtctcag |
| Set 9  | atggaggctgctgccggtgag         | ggcagacatcctgtgcacaactct           |
| Set 10 | actgaggatccatggaggctgctgccggt | tgtgtctcgagtcaggagcacagggcagaca    |
